# Supplementary material
Source: ML conference proceedings conference paper supplement (https://openreview.net/forum?id=VDdDvnwFoyM)
Supplement: supplementary_material [file attachment]

## Sheet: Sheet1
metric	model	train_perc	air	energy	sine	stocks2
disc_score	T_forcing	2	0.500 +/- 0.000	0.500 +/- 0.000	0.295 +/- 0.320	0.300 +/- 0.316
disc_score	T_forcing	5	0.497 +/- 0.006	0.499 +/- 0.003	0.484 +/- 0.014	0.449 +/- 0.069
disc_score	T_forcing	10	0.500 +/- 0.000	0.500 +/- 0.001	0.482 +/- 0.006	0.474 +/- 0.071
disc_score	T_forcing	20	0.500 +/- 0.000	0.500 +/- 0.001	0.490 +/- 0.003	0.372 +/- 0.241
disc_score	T_forcing	100	0.495 +/- 0.010	0.499 +/- 0.001	0.484 +/- 0.006	0.450 +/- 0.099
disc_score	rcgan	2	0.494 +/- 0.017	0.500 +/- 0.000	0.492 +/- 0.021
disc_score	rcgan	5	0.500 +/- 0.000	0.500 +/- 0.000	0.499 +/- 0.003	0.500 +/- 0.000
disc_score	rcgan	10	0.500 +/- 0.000	0.500 +/- 0.000	0.246 +/- 0.234	0.474 +/- 0.071
disc_score	rcgan	20	0.500 +/- 0.000	0.500 +/- 0.000	0.281 +/- 0.132	0.479 +/- 0.028
disc_score	rcgan	100	0.495 +/- 0.002	0.500 +/- 0.000	0.382 +/- 0.075	0.494 +/- 0.006
disc_score	timegan	2	0.167 +/- 0.242	0.468 +/- 0.062	0.192 +/- 0.273
disc_score	timegan	5	0.355 +/- 0.230	0.497 +/- 0.003	0.281 +/- 0.185	0.040 +/- 0.029
disc_score	timegan	10	0.257 +/- 0.093	0.500 +/- 0.001	0.382 +/- 0.055	0.068 +/- 0.106
disc_score	timegan	20	0.355 +/- 0.045	0.493 +/- 0.007	0.374 +/- 0.102	0.042 +/- 0.068
disc_score	timegan	100	0.387 +/- 0.026	0.499 +/- 0.000	0.437 +/- 0.023	0.011 +/- 0.013
disc_score	vae_conv_I	2	0.154 +/- 0.163	0.492 +/- 0.018	0.048 +/- 0.058	0.300 +/- 0.147
disc_score	vae_conv_I	5	0.292 +/- 0.207	0.500 +/- 0.001	0.051 +/- 0.068	0.191 +/- 0.141
disc_score	vae_conv_I	10	0.425 +/- 0.067	0.499 +/- 0.001	0.053 +/- 0.045	0.080 +/- 0.108
disc_score	vae_conv_I	20	0.350 +/- 0.089	0.499 +/- 0.002	0.039 +/- 0.030	0.176 +/- 0.208
disc_score	vae_conv_I	100	0.381 +/- 0.037	0.498 +/- 0.006	0.021 +/- 0.040	0.009 +/- 0.009
pred_score	T_forcing	2	0.185 +/- 0.086	0.266 +/- 0.005	0.225 +/- 0.005	0.155 +/- 0.003
pred_score	T_forcing	5	0.185 +/- 0.012	0.263 +/- 0.011	0.221 +/- 0.006	0.131 +/- 0.026
pred_score	T_forcing	10	0.157 +/- 0.027	0.262 +/- 0.014	0.216 +/- 0.002	0.118 +/- 0.040
pred_score	T_forcing	20	0.139 +/- 0.061	0.256 +/- 0.006	0.219 +/- 0.007	0.091 +/- 0.024
pred_score	T_forcing	100	0.101 +/- 0.028	0.287 +/- 0.035	0.220 +/- 0.010	0.082 +/- 0.004
pred_score	orig	2	0.026 +/- 0.003	0.106 +/- 0.002	0.222 +/- 0.002	0.144 +/- 0.006
pred_score	orig	5	0.022 +/- 0.001	0.144 +/- 0.015	0.217 +/- 0.000	0.078 +/- 0.002
pred_score	orig	10	0.002 +/- 0.001	0.162 +/- 0.004	0.214 +/- 0.000	0.072 +/- 0.000
pred_score	orig	20	0.004 +/- 0.001	0.187 +/- 0.003	0.215 +/- 0.000	0.049 +/- 0.001
pred_score	orig	100	0.004 +/- 0.000	0.229 +/- 0.002	0.213 +/- 0.000	0.019 +/- 0.004
pred_score	rcgan	2	0.361 +/- 0.079	1.451 +/- 0.024	0.320 +/- 0.005
pred_score	rcgan	5	0.428 +/- 0.045	0.499 +/- 0.054	0.222 +/- 0.002	0.669 +/- 0.252
pred_score	rcgan	10	0.605 +/- 0.618	0.740 +/- 0.371	0.241 +/- 0.030	0.150 +/- 0.094
pred_score	rcgan	20	0.480 +/- 0.315	0.751 +/- 0.434	0.254 +/- 0.001	0.164 +/- 0.122
pred_score	rcgan	100	0.043 +/- 0.002	0.277 +/- 0.011	0.262 +/- 0.024	0.025 +/- 0.002
pred_score	timegan	2	0.057 +/- 0.003	0.313 +/- 0.003	0.270 +/- 0.004
pred_score	timegan	5	0.046 +/- 0.005	0.329 +/- 0.010	0.262 +/- 0.032	0.080 +/- 0.001
pred_score	timegan	10	0.003 +/- 0.001	0.318 +/- 0.006	0.300 +/- 0.059	0.081 +/- 0.008
pred_score	timegan	20	0.007 +/- 0.002	0.324 +/- 0.005	0.287 +/- 0.051	0.050 +/- 0.001
pred_score	timegan	100	0.005 +/- 0.000	0.298 +/- 0.002	0.251 +/- 0.027	0.021 +/- 0.001
pred_score	vae_conv_I	2	0.056 +/- 0.005	0.260 +/- 0.003	0.223 +/- 0.001	0.153 +/- 0.008
pred_score	vae_conv_I	5	0.040 +/- 0.002	0.262 +/- 0.002	0.218 +/- 0.001	0.084 +/- 0.004
pred_score	vae_conv_I	10	0.005 +/- 0.003	0.275 +/- 0.001	0.215 +/- 0.000	0.075 +/- 0.001
pred_score	vae_conv_I	20	0.019 +/- 0.003	0.288 +/- 0.002	0.215 +/- 0.000	0.052 +/- 0.001
pred_score	vae_conv_I	100	0.013 +/- 0.002	0.268 +/- 0.004	0.213 +/- 0.000	0.019 +/- 0.001
